# Supplementary material
Source: Frontiers journal article supplement (https://www.frontiersin.org/articles/55666)

## Supplemental Table ST1. Custom EncounterLog schema.

| <b>Data Field</b> | <b>Description</b>                    |
|-------------------|---------------------------------------|
| date              | Visit date                            |
| time              | Visit time                            |
| encounter_type    | Type of encounter                     |
| project_timepoint | Months from baseline                  |
| subject_status    | Subject status at timepoint encounter |
| comment           | Comment at timepoint encounter        |

## Supplemental Table ST2. Extended nundaDemographicData and relationship schema.

| <b>Data Field</b>             | <b>Description</b>                     |
|-------------------------------|----------------------------------------|
| maritalStatus                 | Marital status                         |
| housingType                   | Type of housing                        |
| siblingsNumber                | Number of siblings                     |
| siblingAge1                   | Age of sibling 1                       |
| siblingAge2                   | Age of sibling 2                       |
| siblingAge3                   | Age of sibling 3                       |
| siblingAge4                   | Age of sibling 4                       |
| siblingAge5                   | Age of sibling 5                       |
| siblingAge6                   | Age of sibling 6                       |
| siblingAge7                   | Age of sibling 7                       |
| siblingAge8                   | Age of sibling 8                       |
| NumberOfChildren              | Number of children                     |
| employmentStatus              | Employment status                      |
| currentOccupation             | Current occupation                     |
| principalOccupation           | Principal occupation                   |
| educationLevel                | Highest degree earned                  |
| yearsOfSchooling              | Number of years attended school        |
| attendSpecialClasses          | Attended special education classes?    |
| specialClass                  | Type of special education class        |
| educationLevelFather          | Father's highest degree earned         |
| schoolingLevelFather          | Number of years father attended school |
| educationLevelMother          | Mother's highest degree earned         |
| schoolingLevelMother          | Number of years mother attended school |
| sesDesc                       |                                        |
| handednessExam/writing        | Preferred hand for writing             |
| handednessExam/throwing       | Preferred hand for throwing            |
| handednessExam/scissors       | Preferred hand for scissors            |
| handednessExam/toothbrush     | Preferred hand for toothbrush          |
| handednessExam/knife          | Preferred hand for knife               |
| handednessExam/spoon          | Preferred hand for spoon               |
| handednessExam/broom          | Preferred hand for broom               |
| handednessExam/match          | Preferred hand for match               |
| handednessExam/box            | Preferred hand for box                 |
| handednessExam/footkick       | Preferred hand for foot kick           |
| handednessExam/eye            | Preferred sighting eye                 |
| relationship/otherID          | Subject ID in the study                |
| relationship/relationshipType | Relationship to subject                |

## Supplemental Table ST3. Custom symptomsSAPSSANS schema.

| Data Field | Description                        | Data Field | Description                                  |
|------------|------------------------------------|------------|----------------------------------------------|
| saps1      | Auditory Hallucination             | sans1      | Unchanging Facial Expressions                |
| saps2      | Voices Commenting                  | sans2      | Decreased Spontaneous Movement               |
| saps3      | Voices Conversing                  | sans3      | Paucity of Expressive Gestures               |
| saps4      | Somatic or Tactile Hallucinations  | sans4      | Poor Eye Contact                             |
| saps5      | Olfactory Hallucinations           | sans5      | Affective Nonresponsivity                    |
| saps6      | Visual Hallucinations              | sans6      | Inappropriate Affect                         |
| saps7      | Global Rating of Hallucinations    | sans7      | Lack of Vocal Inflections                    |
| saps8      | Persecutory Hallucinations         | sans8      | Global Rating of Affective Flattening        |
| saps9      | Delusions of Jealousy              | sans9      | Poverty of Speech                            |
| saps10     | Delusions of Guilt or Sin          | sans10     | Poverty of Content of Speech                 |
| saps11     | Grandiose Delusions                | sans11     | Blocking                                     |
| saps12     | Religious Delusions                | sans12     | Increased Latency of Response                |
| saps13     | Somatic Delusions                  | sans13     | Global Rating of Alogia                      |
| saps14     | Delusions of Reference             | sans14     | Grooming and Hygiene                         |
| saps15     | Delusions of Being Controlled      | sans15     | Inpersistance at Work or School              |
| saps16     | Delusions of Mind Reading          | sans16     | Physical Anergia                             |
| saps17     | Thought Broadcasting               | sans17     | Global Rating of Avolution Apathy            |
| saps18     | Thought Insertion                  | sans18     | Recreational Interests and Activities        |
| saps19     | Thought Withdrawal                 | sans19     | Sexual Activity                              |
| saps20     | Global Rating of Delusions         | sans20     | Ability to feel Intimacy and Closeness       |
| saps21     | Clothing and Appearance            | sans21     | Relationships with Friends and Peers         |
| saps22     | Social and Sexual Behavior         | sans22     | Global Rating of Anhedonia-Asociality        |
| saps23     | Aggressive and Agitated Behavior   | sans23     | Social Inattentiveness                       |
| saps24     | Repetitive or Stereotyped Behavior | sans24     | Inattentiveness During Mental Status Testing |
| saps25     | Global Rating of Bizarre Behavior  | sans25     | Global Rating of Attention                   |
| saps26     | Derailment                         |            |                                              |
| saps27     | Tangentiality                      |            |                                              |
| saps28     | Incoherence                        |            |                                              |
| saps29     | Illogicality                       |            |                                              |
| saps30     | Circumstantiality                  |            |                                              |
| saps31     | Pressure of Speech                 |            |                                              |
| saps32     | Distractible Speech                |            |                                              |
| saps33     | Clanging                           |            |                                              |
| saps34     | Global Rating of Positive Thought  |            |                                              |

## Supplemental Table ST4. Custom symptomsNeurocog schema.

| <b>Data Field</b> | <b>Description</b>                                                                       |
|-------------------|------------------------------------------------------------------------------------------|
| dfbv              | Days from baseline value                                                                 |
| yfbv              | Years from baseline value                                                                |
| z_iq_2grp         | <i>Crystallized IQ</i> z-score of cognitive domain score based on 2-group calculations   |
| z_wm_2grp         | <i>Working Memory</i> z-score of cognitive domain score based on 2-group calculations    |
| z_em_2grp         | <i>Episodic Memory</i> z-score of cognitive domain score based on 2-group calculations   |
| z_ra_2grp         | <i>Reasoning Ability</i> z-score of cognitive domain score based on 2-group calculations |
| z_pos_2grp        | <i>Positive Symptoms</i> z-score of psychopathology based on 2-group calculations        |
| z_neg_2grp        | <i>Negative Symptoms</i> z-score of psychopathology based on 2-group calculations        |
| z_dis_2grp        | <i>Disorganized Thought</i> z-score of psychopathology based on 2-group calculations     |
| z_iq_4grp         | <i>Crystallized IQ</i> z-score of cognitive domain score based on 4-group calculations   |
| z_attn_4grp       | <i>Attention</i> z-score of cognitive domain score based on 2-group calculations         |
| z_wm_4grp         | <i>Working Memory</i> z-score of cognitive domain score based on 4-group calculations    |
| z_em_4grp         | <i>Episodic Memory</i> z-score of cognitive domain score based on 4-group calculations   |
| z_ra_4grp         | <i>Reasoning Ability</i> z-score of cognitive domain score based on 4-group calculations |
| z_pos_4grp        | <i>Positive Symptoms</i> z-score of psychopathology based on 4-group calculations        |
| z_neg_4grp        | <i>Negative Symptoms</i> z-score of psychopathology based on 4-group calculations        |
| z_dis_4grp        | <i>Disorganized Thought</i> z-score of psychopathology based on 4-group calculations     |

Supplemental Table ST5. Custom genetics schema.

| Data Field | Description                  |
|------------|------------------------------|
| name       | Gene name                    |
| genotype   | Genotype                     |
| minorpos   | Minor Positive Allele        |
| heteropos  | Heterozygous Positive Allele |

Supplemental Figure SF1. Custom EncounterLog schema.

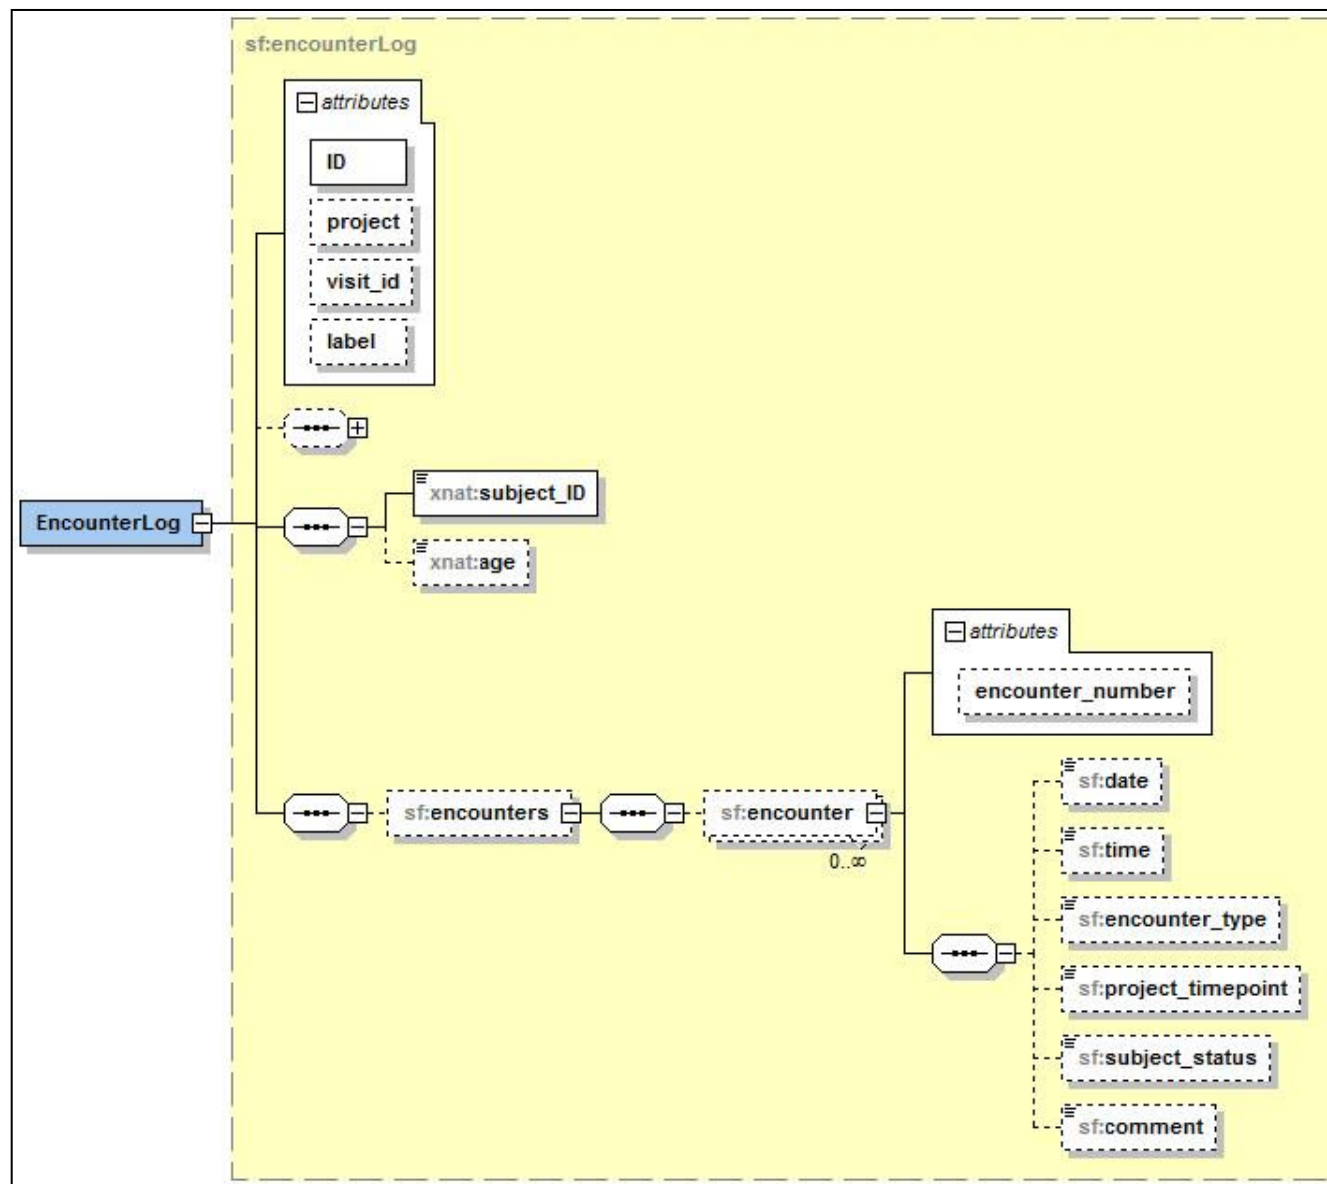

Supplemental Figure SF2. Extended nundaDemographicData and relationship schema.

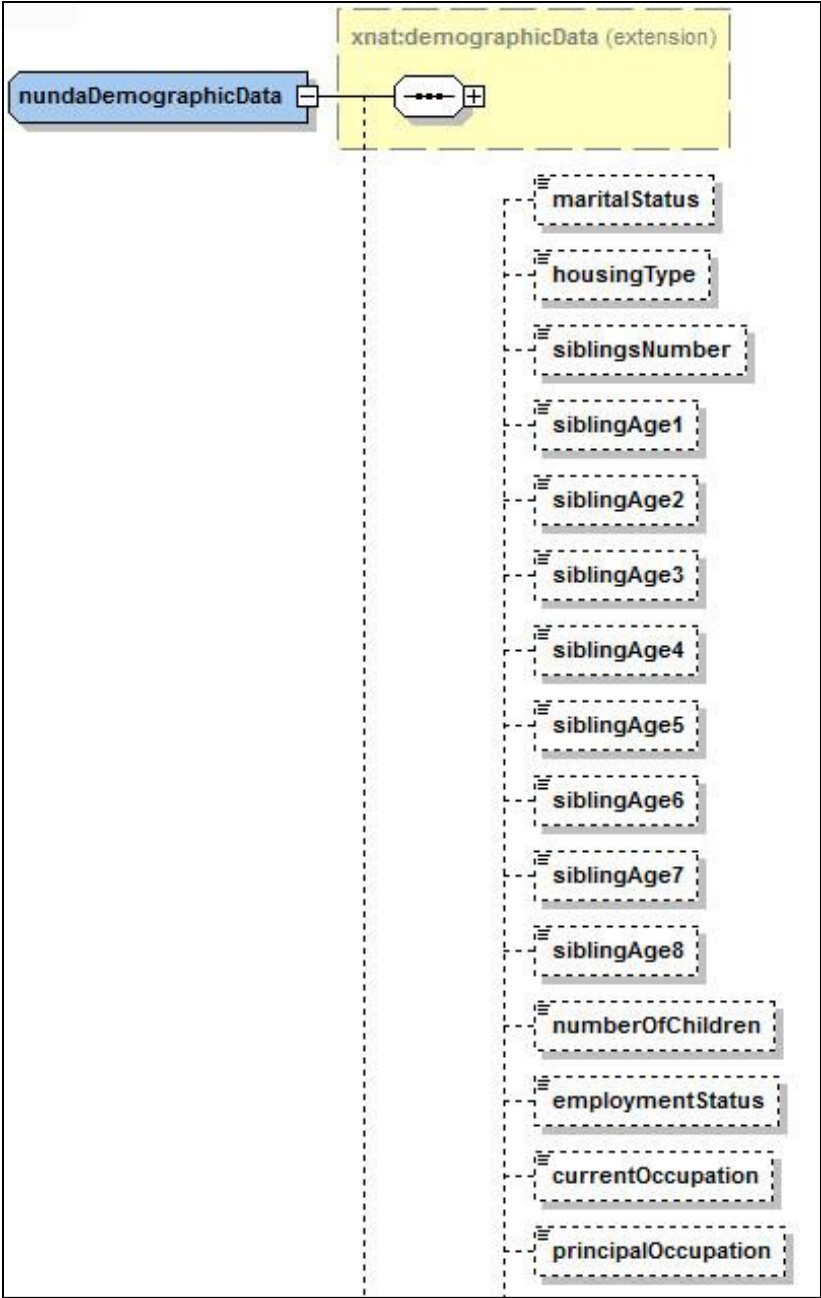

Supplemental Figure SF3. Custom symptomsSAPSSANS schema.

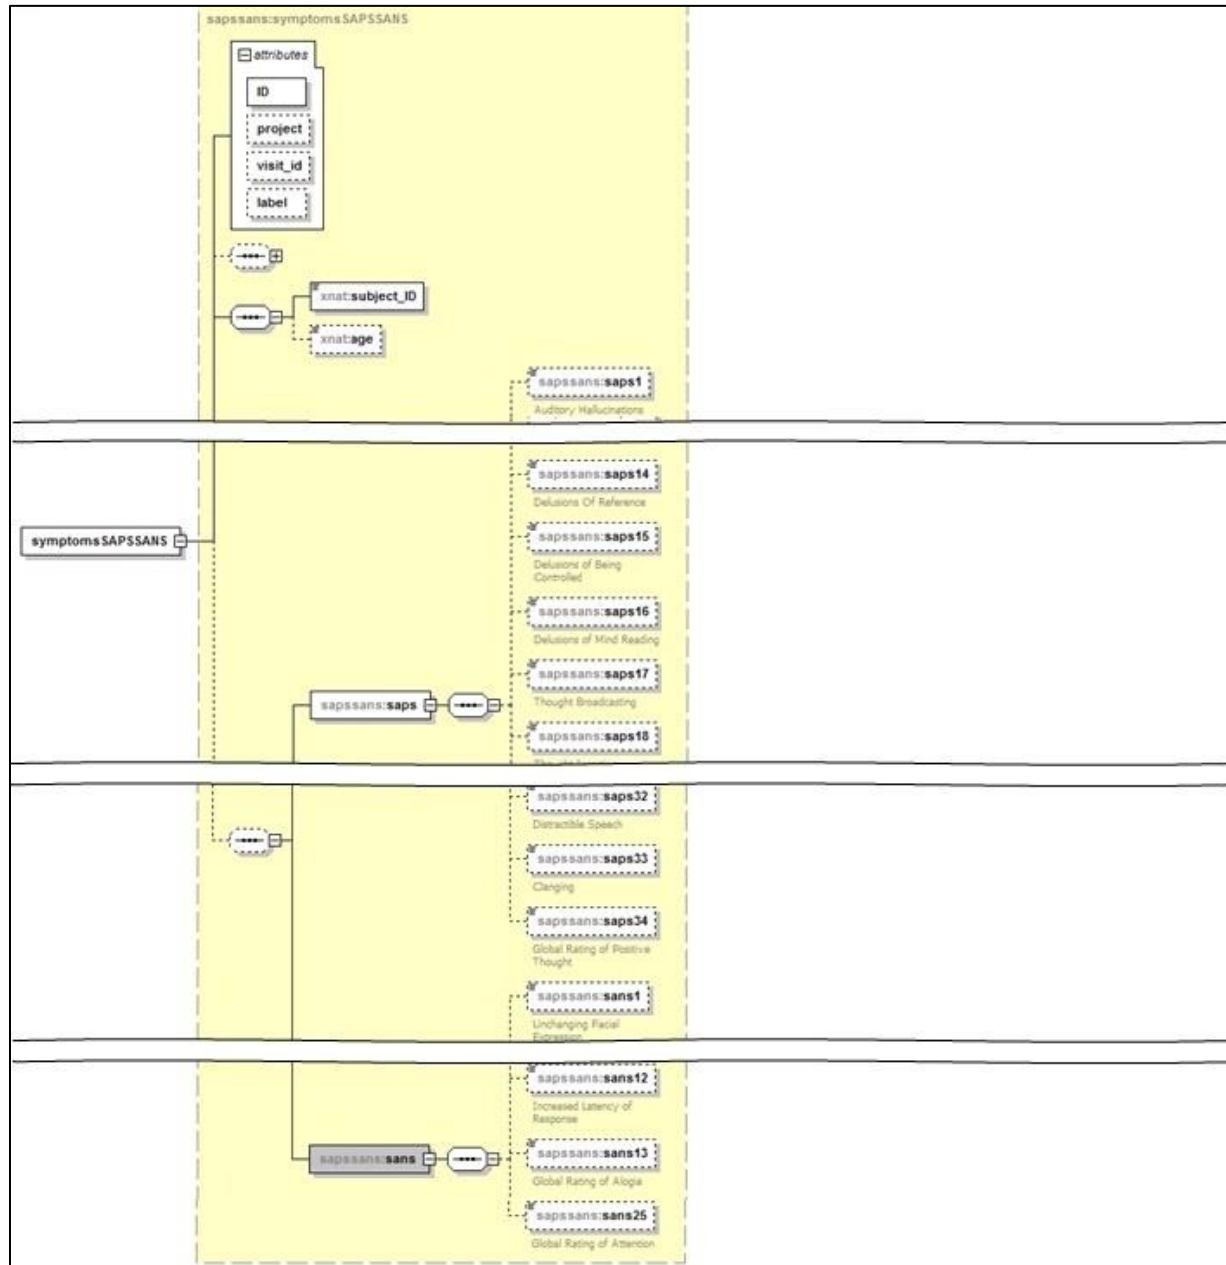



Supplemental Figure SF4. Custom symptomsNeurocog schema.

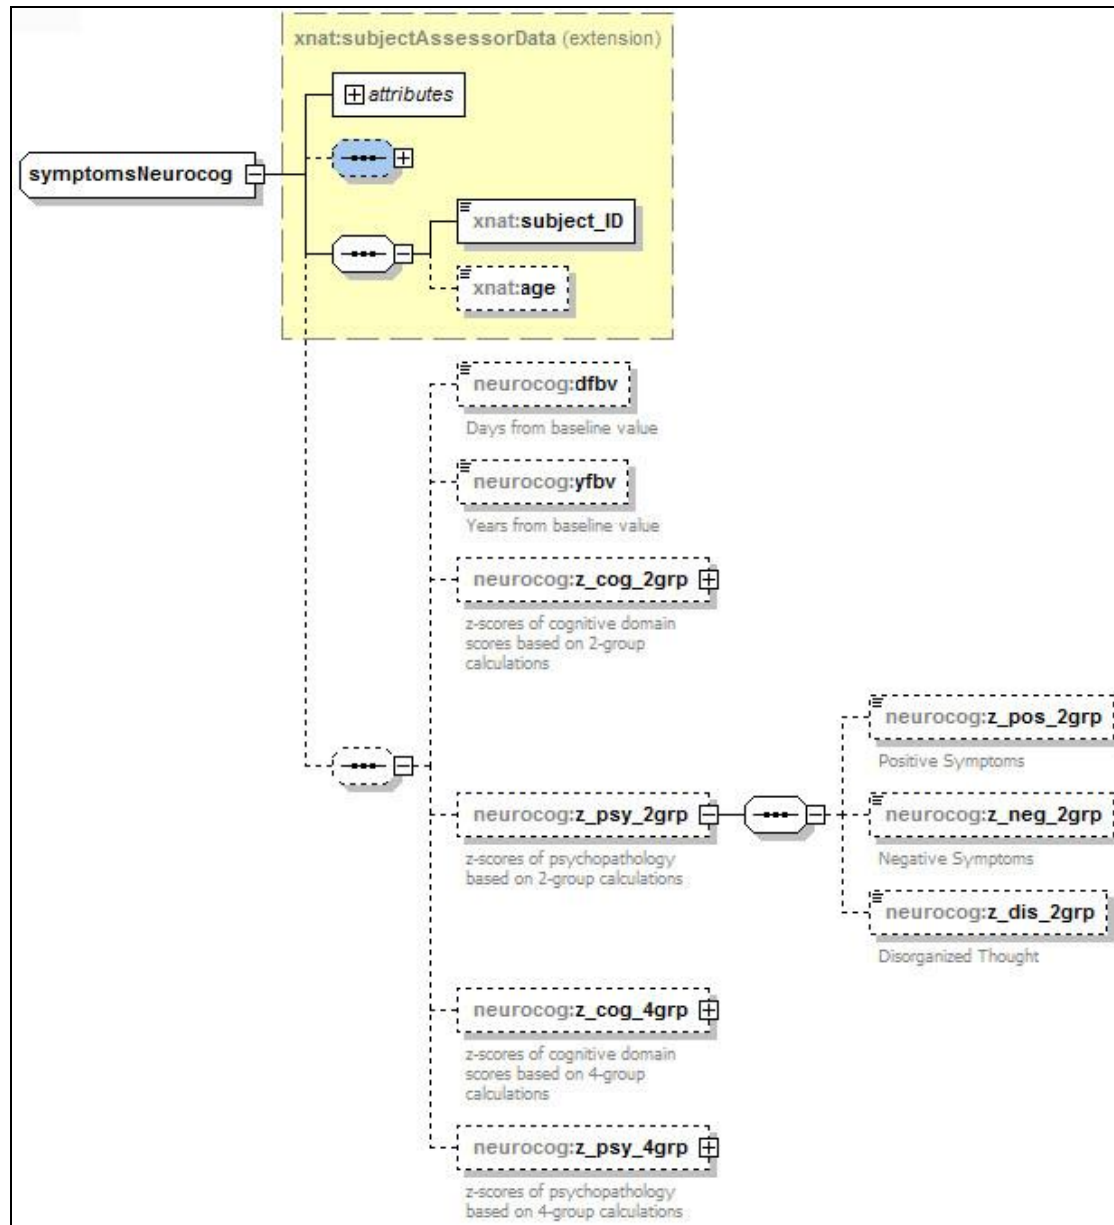

Supplemental Figure SF5. Custom genetics schema.

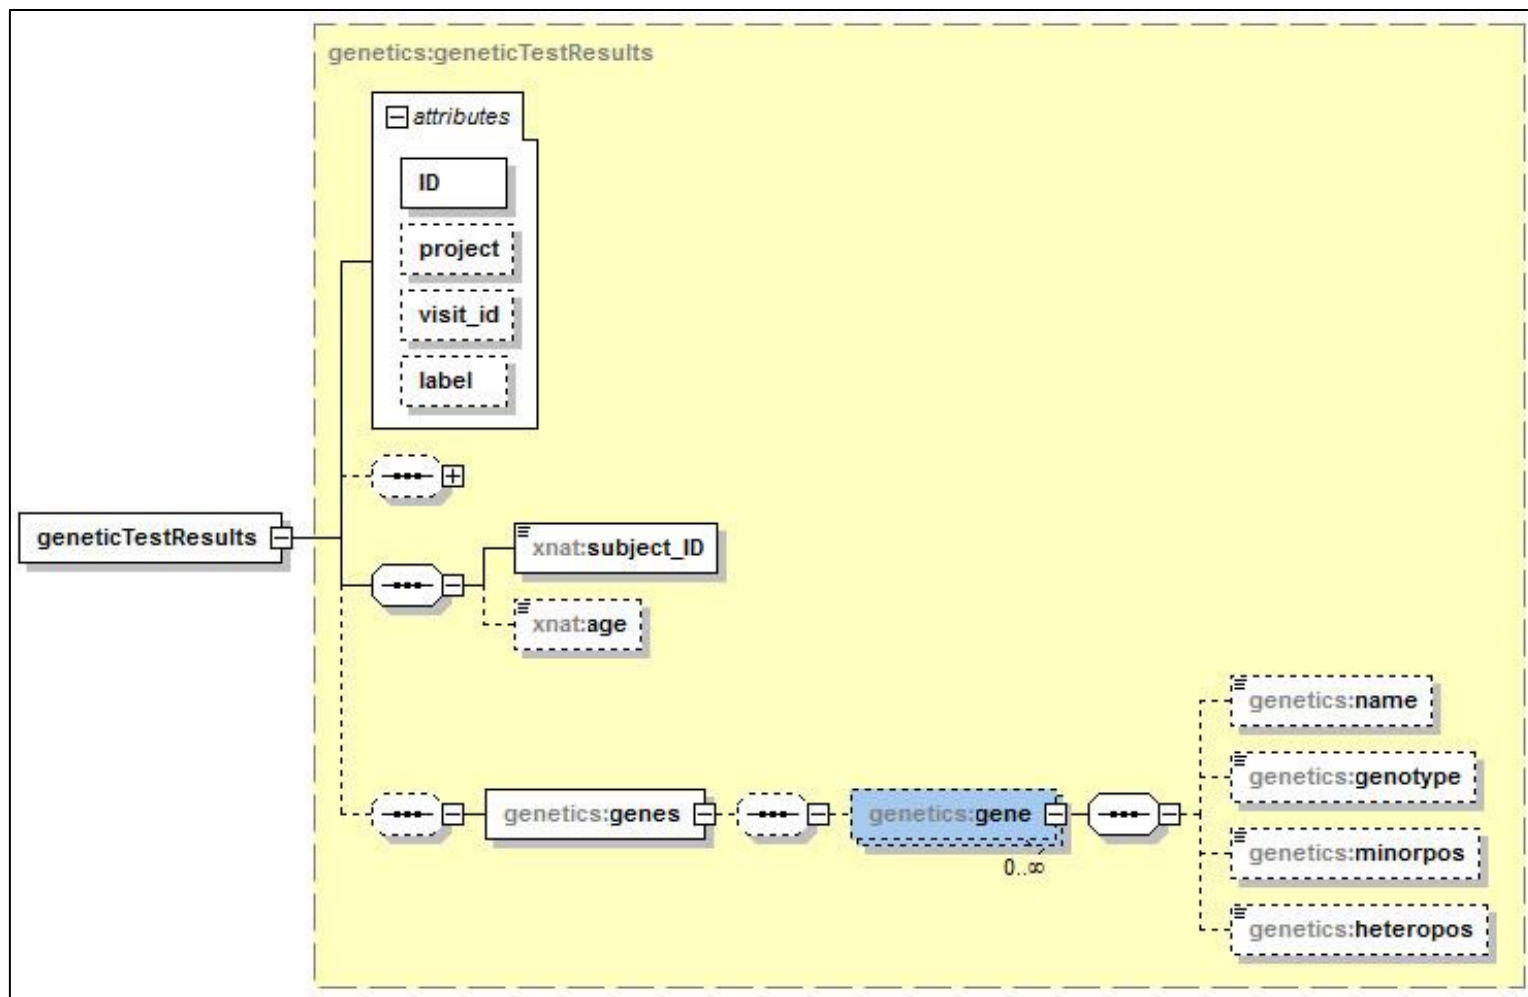

Supplement: Data_Sheet_1.PDF [file Data_Sheet_1.PDF]
